# Supplementary material for: The Effect of Different Agrotechnical Treatments on the Establishment of Miscanthus Hybrids in Soil Contaminated with Trace Metals
Source: MDPI journal article supplement (doi:10.3390/plants12010098), 2022-12-25

**Table S1.** Biochar properties, TerrAfix Ltd. UK (n=5), bdl – below detection limit

| Biochar               |             |
|-----------------------|-------------|
| Parameter             |             |
| pH (H <sub>2</sub> O) | 9,4 ±0,08   |
| pH (KCl)              | 8,3 ±0,13   |
| EC [μS/cm]            | 110,1 ±12   |
| Pb [mg/kg]            | 2,2 ±0,23   |
| Cd [mg/kg]            | bdl         |
| Zn [mg/kg]            | 47,5 ±2,34  |
| As [mg/kg]            | 0,3 ±0,08   |
| P [mg/kg]             | 337 ±7      |
| K [mg/kg]             | 2738 ±165   |
| Mg [mg/kg]            | 804 ±15     |
| Cl [%]                | 0,1 ±004    |
| C [%]                 | 77,8 ±0,86  |
| H [%]                 | 3,1 ±0,05   |
| N [%]                 | 0,3 ±0,01   |
| S [%]                 | 0,01 ±0,002 |

**Figure S1.** Meteorological data for experiment period (2021-2022) for Bytom site

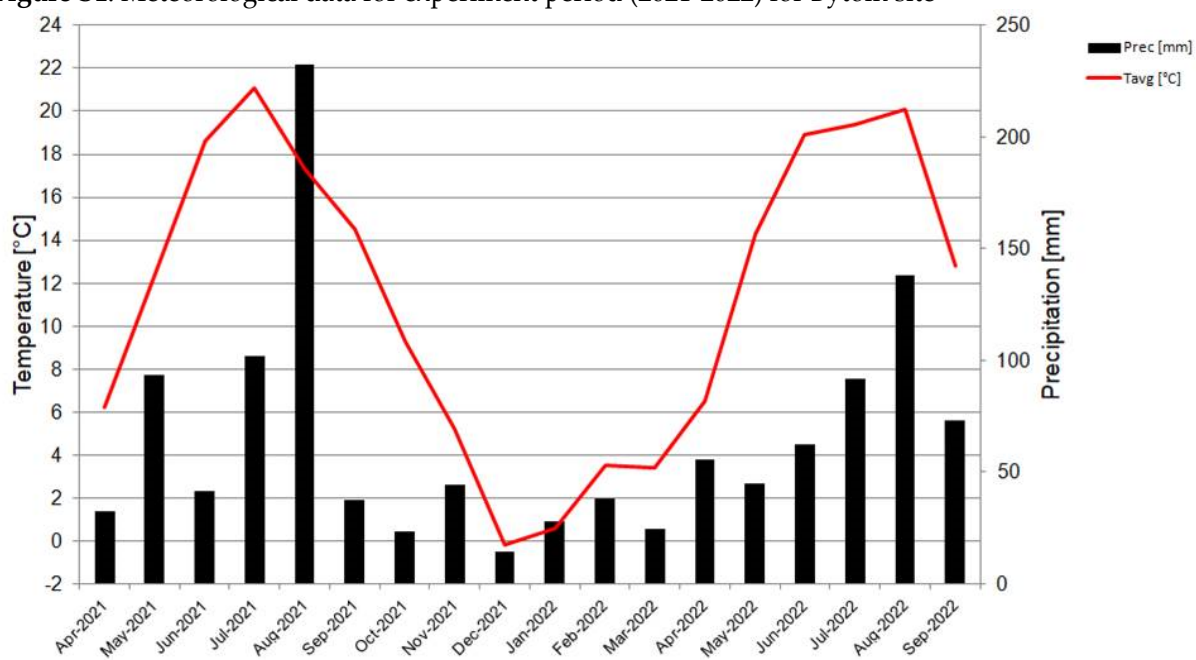

Supplement: s1 [file s1]
